# Supplementary material
Source: Springer Nature journal article supplement (https://www.springermedizin.de/resource/supplementary/12889_2013_7521_MOESM2_ESM.pdf/9498394)

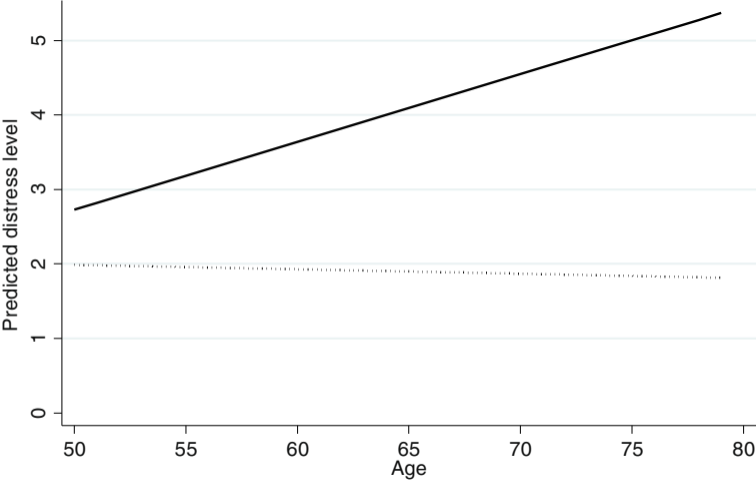

— Mean trajectory in negative affect      ..... Mean trajectory in lack of positive affect

Supplement: MOESM2 [file 9498394]
